# Supplementary material for: Prevalence of respiratory symptoms and spirometric changes among non-smoker male wood workers
Source: PubMed Central journal article supplement (PMC7080227; doi:10.1371/journal.pone.0224860), 2020-03-18
Supplement: pone.0224860.s001.pdf [file pone.0224860.s001.pdf]

با تشکر از مشارکت شما. همکاری شما جهت موفقیت این پروژه بسیار مهم میباشد

لطفا این پرسشنامه را تکمیل کنید. لطفا به سوالات این پرسشنامه با دقت و صادقانه پاسخ دهید

تمامی اطلاعات و پاسخ های شما محفوظ میباشد و بجز در تحقیق بکار نخواهد رفت

در صورت تمایل شما، پزشکتان از نتایج آزمایش شما مطلع خواهد شد

لطفا پاسخ های خود را با کشیدن دایره به دور پاسخ مد نظرتان مشخص کنید. در زمان

ویزیت به شما جهت پر کردن فرم کمک خواهد شد

به عنوان مثال

آیا شما در ایران زندگی میکنید؟

خیر

بلی

تاریخ روز/ماه/سال

شماره بیمار

شغل

شماره مرکز پزشکی

جنس

تاریخ تولد/محل تولد

وزن

ادرس

تلفن

مصاحبه کننده/پزشک

۱. سابقه مصرف دخانیات (سیگار، سیگار برگ، قلیان، پایپ، غیره)

|                                |     |     |
|--------------------------------|-----|-----|
| آیا تا به حال سیگار کشیده اید؟ | بلی | خیر |
|--------------------------------|-----|-----|

(نه به معنی این است که شما کمتر از ۲۰ پاکت در زندگیتان سیگار کشیده اید)

|                            |     |     |
|----------------------------|-----|-----|
| آیا هم اکنون سیگاری هستید؟ | بلی | خیر |
|----------------------------|-----|-----|

۲. آیا دارای سابقه / تا کنون تشخیص بیماری مزمن ریه از جمله (و نه محدود به) هستید؟

| اسم                             | بلی | خیر |
|---------------------------------|-----|-----|
| بیماری انسدادی مزمن ریه         | بلی | خیر |
| عفونت مزمن ریوی از جمله سل ریوی | بلی | خیر |
| فیروز ریه                       | بلی | خیر |
| کانشر ریه/پلور                  | بلی | خیر |
| پنوموکونیوزیس                   | بلی | خیر |

|     |     |                            |
|-----|-----|----------------------------|
| خیر | بلی | سارکوییدوزیس با درگیری ریه |
| خیر | بلی | ترومبو آمبولی ریه          |
| خیر | بلی | افزایش فشار شریان ریوی     |
|     |     | سایر موارد                 |

اگر پاسخ به سوالات یک و دو نه میباشد به سوال سه مراجعه کنی

سابقه پزشکی، سابقه جراحی، سابقه مصرف دارو

|  |     | سابقه پزشکی |                     |
|--|-----|-------------|---------------------|
|  |     | بلی         | دیابت نوع دو        |
|  | خیر | بلی         | فشار خون            |
|  | خیر | بلی         | چربی خون بالا       |
|  | خیر | بلی         | بیماری ایسکمی قلبی  |
|  | خیر | بلی         | درگیری عضلات /مفاصل |

|  |     | سابقه جراحی |                                |
|--|-----|-------------|--------------------------------|
|  |     | بلی         | ایا سابقه جراحی قلبی داشته اید |
|  | خیر | بلی         |                                |

|  |            |                                    |
|--|------------|------------------------------------|
|  |            | سابقه دارو                         |
|  | بلی<br>خیر | ایا طی سال گذشته دارو مصرف میکردید |

## علاقم مرتبط با درگیری ریه

### چهار. خس خس

|     |     |                                               |
|-----|-----|-----------------------------------------------|
| خیر | بلی | ایا طی ۱۲ ماه گذشته شما خس خس سینه داشته اید؟ |
|-----|-----|-----------------------------------------------|

اگر پاسخ به سوال 'نه' میباشد به سراغ سوال ۵ بروید

|     |     |                                                                   |
|-----|-----|-------------------------------------------------------------------|
| خیر | بلی | ایا طی ۱۲ ماه گذشته در اغلب روز ها یا شب ها خس خس سینه داشته اید؟ |
|-----|-----|-------------------------------------------------------------------|

|     |     |                                                                                           |
|-----|-----|-------------------------------------------------------------------------------------------|
| خیر | بلی | ایا طی ۱۲ ماه گذشته در روز هایی که کار میکرده اید بیشتر از حد معمول خس خس سینه داشته اید؟ |
|-----|-----|-------------------------------------------------------------------------------------------|

|     |     |                                                                                       |
|-----|-----|---------------------------------------------------------------------------------------|
| خیر | بلی | ایا این خس خس سینه در زمانی که شما سرماخورده ویا عفونت ریوی نداشته بودید رخ داده بود؟ |
|-----|-----|---------------------------------------------------------------------------------------|

### پنج سرفه

|     |     |                                                                            |
|-----|-----|----------------------------------------------------------------------------|
| خیر | بلی | ایا طی ۱۲ ماه گذشته شما سرفه داشته اید؟<br>تمیزکردن گلو را به حساب نیاورید |
|-----|-----|----------------------------------------------------------------------------|

اگر پاسخ به سوال 'نه' میباشد به سراغ سوال ۶ بروید

|     |     |                                                             |
|-----|-----|-------------------------------------------------------------|
| خیر | بلی | ایا طی ۱۲ ماه گذشته در اغلب روز ها یا شب ها سرفه داشته اید؟ |
|-----|-----|-------------------------------------------------------------|

|     |     |                                                                                     |
|-----|-----|-------------------------------------------------------------------------------------|
| خیر | بلی | ایا طی ۱۲ ماه گذشته در روز هایی که کار میکرده اید بیشتر از حد معمول سرفه داشته اید؟ |
|-----|-----|-------------------------------------------------------------------------------------|

|     |     |                                                                                 |
|-----|-----|---------------------------------------------------------------------------------|
| خیر | بلی | ایا این سرفه در زمانی که شما سرماخورده ویا عفونت ریوی نداشته بودید رخ داده بود؟ |
|-----|-----|---------------------------------------------------------------------------------|

### شش خلط

|     |     |                                                                                     |
|-----|-----|-------------------------------------------------------------------------------------|
| خیر | بلی | ایا طی ۱۲ ماه گذشته شما خلط داشته اید؟<br>موکوس و ترشحات پشت حلق را به حساب نیاورید |
|-----|-----|-------------------------------------------------------------------------------------|

اگر پاسخ به سوال 'نه' میباشد به سراغ سوال ۷ بروید

|     |     |                                                            |
|-----|-----|------------------------------------------------------------|
| خیر | بلی | ایا طی ۱۲ ماه گذشته در اغلب روز ها یا شب ها خلط داشته اید؟ |
|-----|-----|------------------------------------------------------------|



|     |     |                                                                                     |
|-----|-----|-------------------------------------------------------------------------------------|
| خیر | بلی | ایا طی ۱۲ ماه گذشته در روز هایی که کار میکرده اید بیشتر از حد معمول خلط داشته اید ؟ |
|-----|-----|-------------------------------------------------------------------------------------|

|     |     |                                                                                |
|-----|-----|--------------------------------------------------------------------------------|
| خیر | بلی | ایا این خلط در زمانی که شما سرماخورده ویا عفونت ریوی نداشته بودید رخ داده بود؟ |
|-----|-----|--------------------------------------------------------------------------------|

### هفت تنگی سینه

|     |     |                                              |
|-----|-----|----------------------------------------------|
| خیر | بلی | ایا طی ۱۲ ماه گذشته شما تنگی سینه داشته اید؟ |
|-----|-----|----------------------------------------------|

اگر پاسخ به سوال 'نه' مییاشد به سراغ سوال ۸ بروید

|     |     |                                                                  |
|-----|-----|------------------------------------------------------------------|
| خیر | بلی | ایا طی ۱۲ ماه گذشته در اغلب روز ها یا شب ها تنگی سینه داشته اید؟ |
|-----|-----|------------------------------------------------------------------|

|     |     |                                                                                           |
|-----|-----|-------------------------------------------------------------------------------------------|
| خیر | بلی | ایا طی ۱۲ ماه گذشته در روز هایی که کار میکرده اید بیشتر از حد معمول تنگی سینه داشته اید ؟ |
|-----|-----|-------------------------------------------------------------------------------------------|

|     |     |                                                                                      |
|-----|-----|--------------------------------------------------------------------------------------|
| خیر | بلی | ایا این تنگی سینه در زمانی که شما سرماخورده ویا عفونت ریوی نداشته بودید رخ داده بود؟ |
|-----|-----|--------------------------------------------------------------------------------------|

## هشت تنگی نفس

|     |     |                                             |
|-----|-----|---------------------------------------------|
| خیر | بلی | ایا طی ۱۲ ماه گذشته شما تنگی نفس داشته اید؟ |
|-----|-----|---------------------------------------------|

اگر پاسخ به سوال 'نه' میباشد به سراغ سوال ۹ بروید

|     |     |                                                                                    |
|-----|-----|------------------------------------------------------------------------------------|
| خیر | بلی | ایا طی ۱۲ ماه گذشته هنگام با لا رفتن از پله با سرعت معمول تنگی تنگی نفس داشته اید؟ |
|-----|-----|------------------------------------------------------------------------------------|

|     |     |                                                                                         |
|-----|-----|-----------------------------------------------------------------------------------------|
| خیر | بلی | ایا این تنگی نفس هنگامی که با هم سن و سالان خودتان با سرعت معمول فعالیت کنید روی میدهد؟ |
|-----|-----|-----------------------------------------------------------------------------------------|

|     |     |                                                                                               |
|-----|-----|-----------------------------------------------------------------------------------------------|
| خیر | بلی | ایا طی ۱۲ ماه گذشته در روز هایی که کار میکرده اید بیشتر از حد معمول تنگی تنگی نفس داشته اید ؟ |
|-----|-----|-----------------------------------------------------------------------------------------------|

|     |     |                                                                                               |
|-----|-----|-----------------------------------------------------------------------------------------------|
| خیر | بلی | ایا طی ۱۲ ماه گذشته در روز هایی که کار میکرده اید بیشتر از حد معمول تنگی تنگی نفس داشته اید ؟ |
|-----|-----|-----------------------------------------------------------------------------------------------|

|     |     |                                                                                          |
|-----|-----|------------------------------------------------------------------------------------------|
| خیر | بلی | ایا این تنگی تنگی نفس در زمانی که شما سرماخورده ویا عفونت ریوی نداشته بودید رخ داده بود؟ |
|-----|-----|------------------------------------------------------------------------------------------|

|     |     |                                                                                                         |
|-----|-----|---------------------------------------------------------------------------------------------------------|
| خیر | بلی | این سوال توسط مصاحبه کننده پاسخ داده شود<br>ایا اختلال راه رفتن به عللی به غیر از درگیری قلبی ریوی است؟ |
|-----|-----|---------------------------------------------------------------------------------------------------------|

### نه احتقان بینی

|     |     |                                                |
|-----|-----|------------------------------------------------|
| خیر | بلی | ایا طی ۱۲ ماه گذشته شما احتقان بینی داشته اید؟ |
|-----|-----|------------------------------------------------|

اگر پاسخ به سوال 'نه' میباشد به سراغ سوال ۱۰ بروید

|     |     |                                                                                             |
|-----|-----|---------------------------------------------------------------------------------------------|
| خیر | بلی | ایا طی ۱۲ ماه گذشته در روز هایی که کار میکرده اید بیشتر از حد معمول احتقان بینی داشته اید ؟ |
|-----|-----|---------------------------------------------------------------------------------------------|

|     |     |                                                                                        |
|-----|-----|----------------------------------------------------------------------------------------|
| خیر | بلی | ایا این احتقان بینی در زمانی که شما سرماخورده ویا عفونت ریوی نداشته بودید رخ داده بود؟ |
|-----|-----|----------------------------------------------------------------------------------------|

## ده ابریزش بینی

|     |     |                                                |
|-----|-----|------------------------------------------------|
| خیر | بلی | ایا طی ۱۲ ماه گذشته شما ابریزش بینی داشته اید؟ |
|-----|-----|------------------------------------------------|

اگر پاسخ به سوال 'نه' میباشد به سراغ سوال ۱۱ بروید

|     |     |                                                                                             |
|-----|-----|---------------------------------------------------------------------------------------------|
| خیر | بلی | ایا طی ۱۲ ماه گذشته در روز هایی که کار میکرده اید بیشتر از حد معمول ابریزش بینی داشته اید ؟ |
|-----|-----|---------------------------------------------------------------------------------------------|

|     |     |                                                                                        |
|-----|-----|----------------------------------------------------------------------------------------|
| خیر | بلی | ایا این ابریزش بینی در زمانی که شما سرماخورده ویا عفونت ریوی نداشته بودید رخ داده بود؟ |
|-----|-----|----------------------------------------------------------------------------------------|

## یازده گلو درد

|     |     |                                            |
|-----|-----|--------------------------------------------|
| خیر | بلی | ایا طی ۱۲ ماه گذشته شما گلو درد داشته اید؟ |
|-----|-----|--------------------------------------------|

|     |     |                                                                                         |
|-----|-----|-----------------------------------------------------------------------------------------|
| خیر | بلی | ایا طی ۱۲ ماه گذشته در روز هایی که کار میکرده اید بیشتر از حد معمول گلو درد داشته اید ؟ |
|-----|-----|-----------------------------------------------------------------------------------------|

|     |     |                                                                                    |
|-----|-----|------------------------------------------------------------------------------------|
| خیر | بلی | ایا این گلو درد در زمانی که شما سرماخورده ویا عفونت ریوی نداشته بودید رخ داده بود؟ |
|-----|-----|------------------------------------------------------------------------------------|

ایا شما درگیری ریه خود را درگیری جدی سلامتی خود میدانید؟

بلی

خیر

ایا در سال گذشته به عللی غیر از سرماخوردگی مجبور به مرخصی از محل کار به علت درگیری ریه شده بودید؟

بلی

خیر
