# Supplementary material for: Prevalence of respiratory symptoms and spirometric changes among non-smoker male wood workers
Source: PubMed Central journal article supplement (PMC7080227; doi:10.1371/journal.pone.0224860), 2020-03-18
Supplement: pone.0224860.s003.pdf [file pone.0224860.s003.pdf]

| Respiratory symptoms in the last 12 months | Wood workers (n=276) | Office workers (n=276) | P-value* |
|--------------------------------------------|----------------------|------------------------|----------|
| Nasal congestion                           | 17 (6.1%)            | 16 (5.8%)              | 0.8575   |
| Rhinorrhea                                 | 11 (4.0%)            | 19 (6.9%)              | 0.1331   |
| Sore/scratchy throat                       | 51 (18.5%)           | 64 (23.2%)             | 0.1730   |
| Cough                                      | 111 (40.2%)          | 81 (29.3%%)            | 0.0073   |
| Phlegm                                     | 112 (40.6%)          | 66 (23.6%)             | <0.0001  |
| Chest tightness                            | 105 (38.0%)          | 64 (23.1%)             | 0.0001   |
| Wheezing                                   | 70 (25.3%)           | 40 (14.5%)             | 0.0014   |
| Dyspnea                                    | 59 (21.3%)           | 52 (18.8%)             | 0.4573   |

\* Chi-square test.
